# Supplementary material for: Impact of a sustained, collaborative antimicrobial stewardship programme in spinal cord injury patients
Source: PubMed Central journal article supplement — JAC Antimicrob Resist. 2023 Nov 22;5(6):dlad111. doi: 10.1093/jacamr/dlad111 (PMC10664407; doi:10.1093/jacamr/dlad111), 2023-11-22
Supplement: dlad111_supplementary_data.pdf [file dlad111_supplementary_data.pdf]

## SUPPLEMENTARY TABLES

| Table of contents:                                                                       | Page/s |
|------------------------------------------------------------------------------------------|--------|
| Figure 1 – Existing Antimicrobial Stewardship (AMS) program                              | 2      |
| Figure 2 – Implemented Antimicrobial Stewardship (AMS) program                           | 3      |
| Figure 3 – Total systemic antimicrobial DOT per 1000 patient bed days                    | 4      |
| Table 1 – Patient demographic, allergies and overall antimicrobial prescribing frequency | 5      |
| Table 2 – Proportion of orders by antimicrobial class                                    | 6-7    |
| Table 3 – Antimicrobial orders of interest                                               | 8      |
| Table 4 – Proportion and duration of antimicrobial courses                               | 9      |
| Table 5 – AMS moments and acceptance rates                                               | 10     |
| Additional information                                                                   | 11     |

**FIGURE 1. EXISTING ANTIMICROBIAL STEWARDSHIP (AMS) PROGRAM**

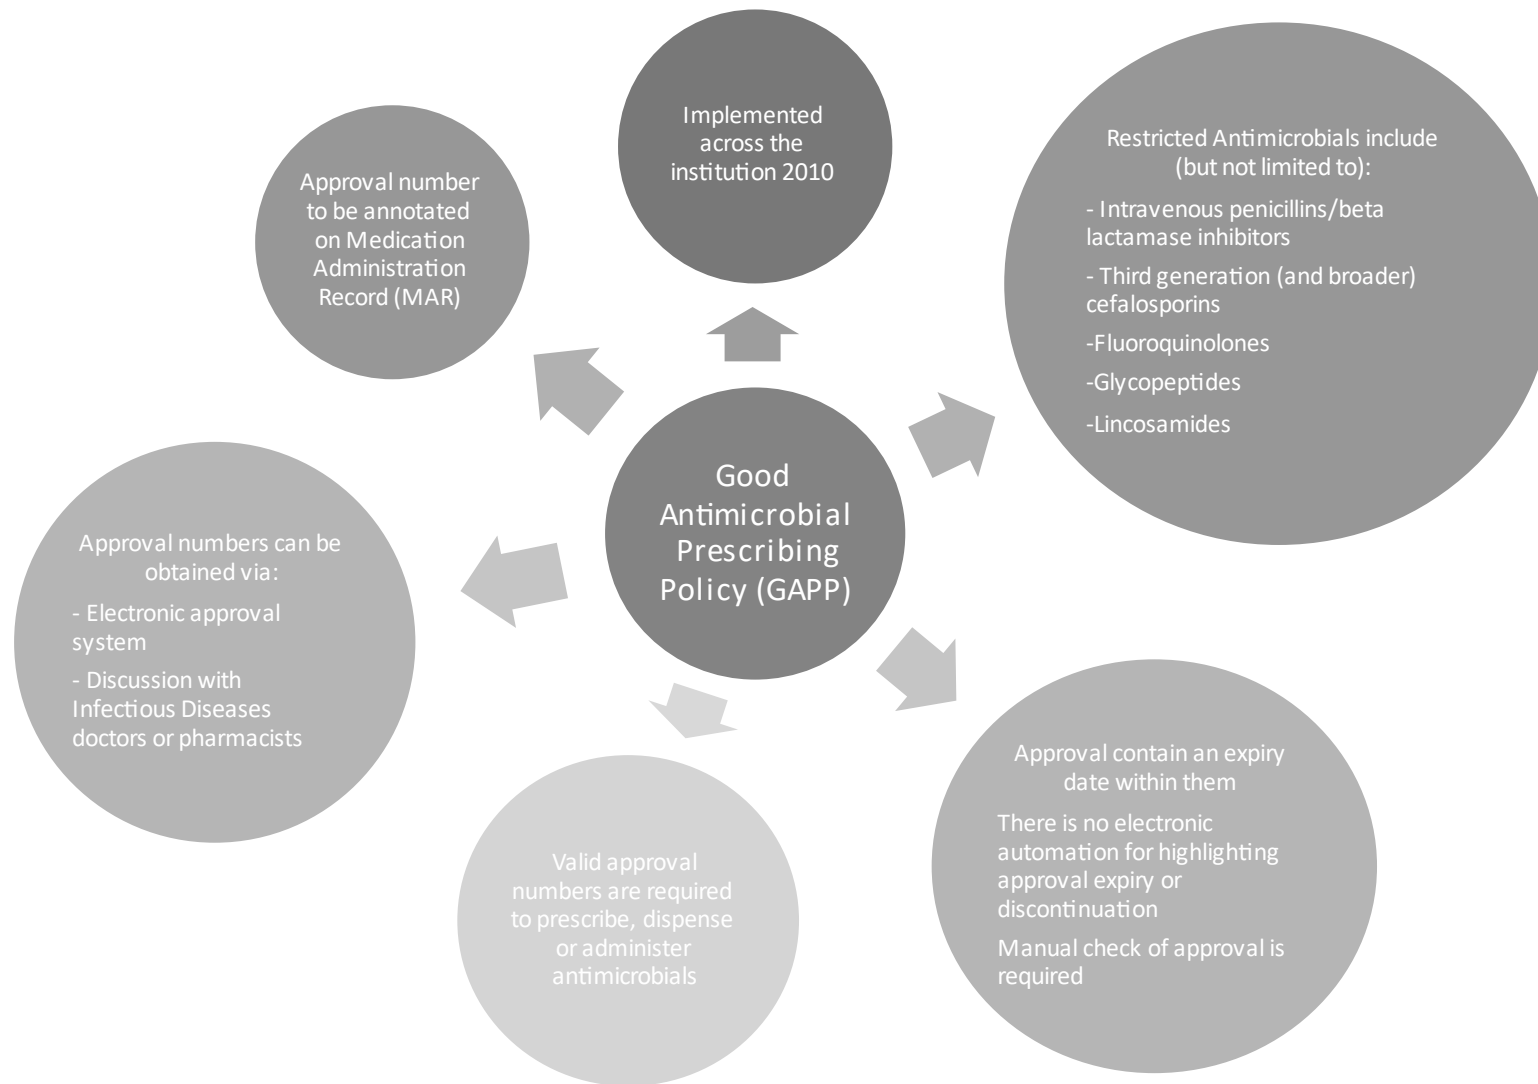

**FIGURE 2. IMPLEMENTED ANTIMICROBIAL STEWARDSHIP (AMS) PROGRAM**

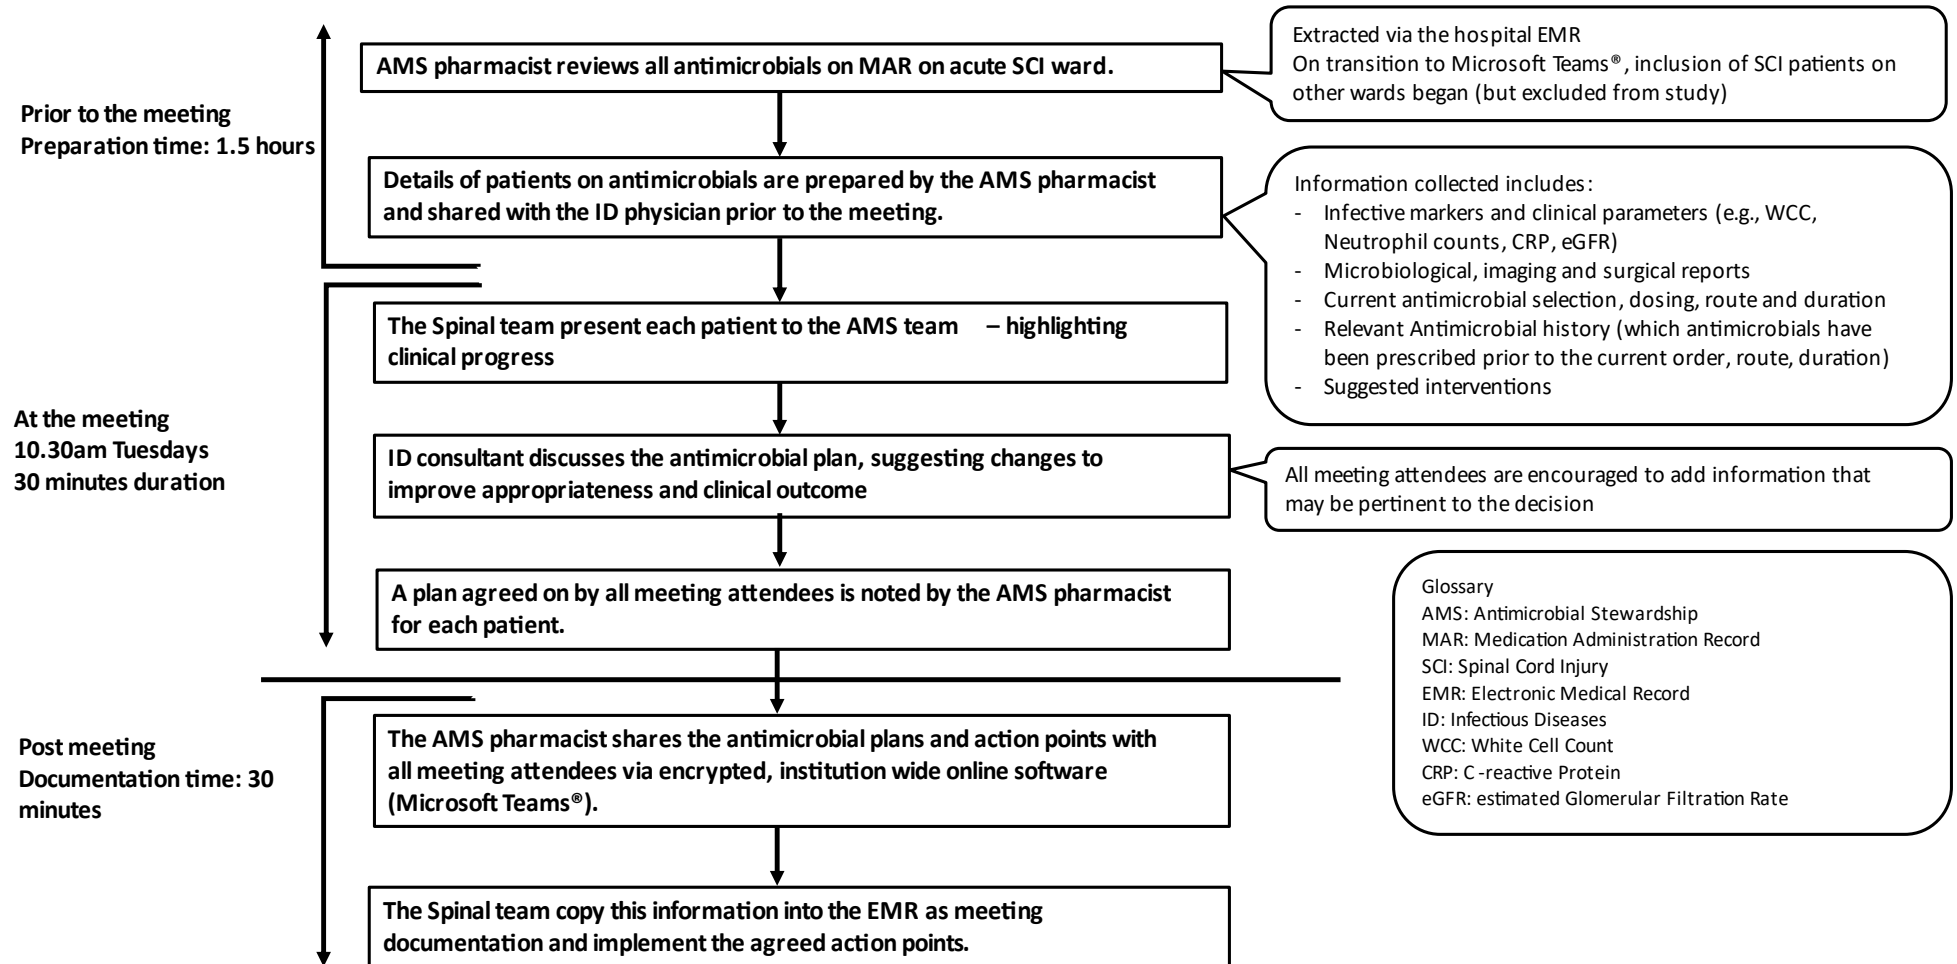

FIGURE 3. TOTAL SYSTEMIC ANTIMICROBIAL DOT PER 1000 PATIENT BED DAYS

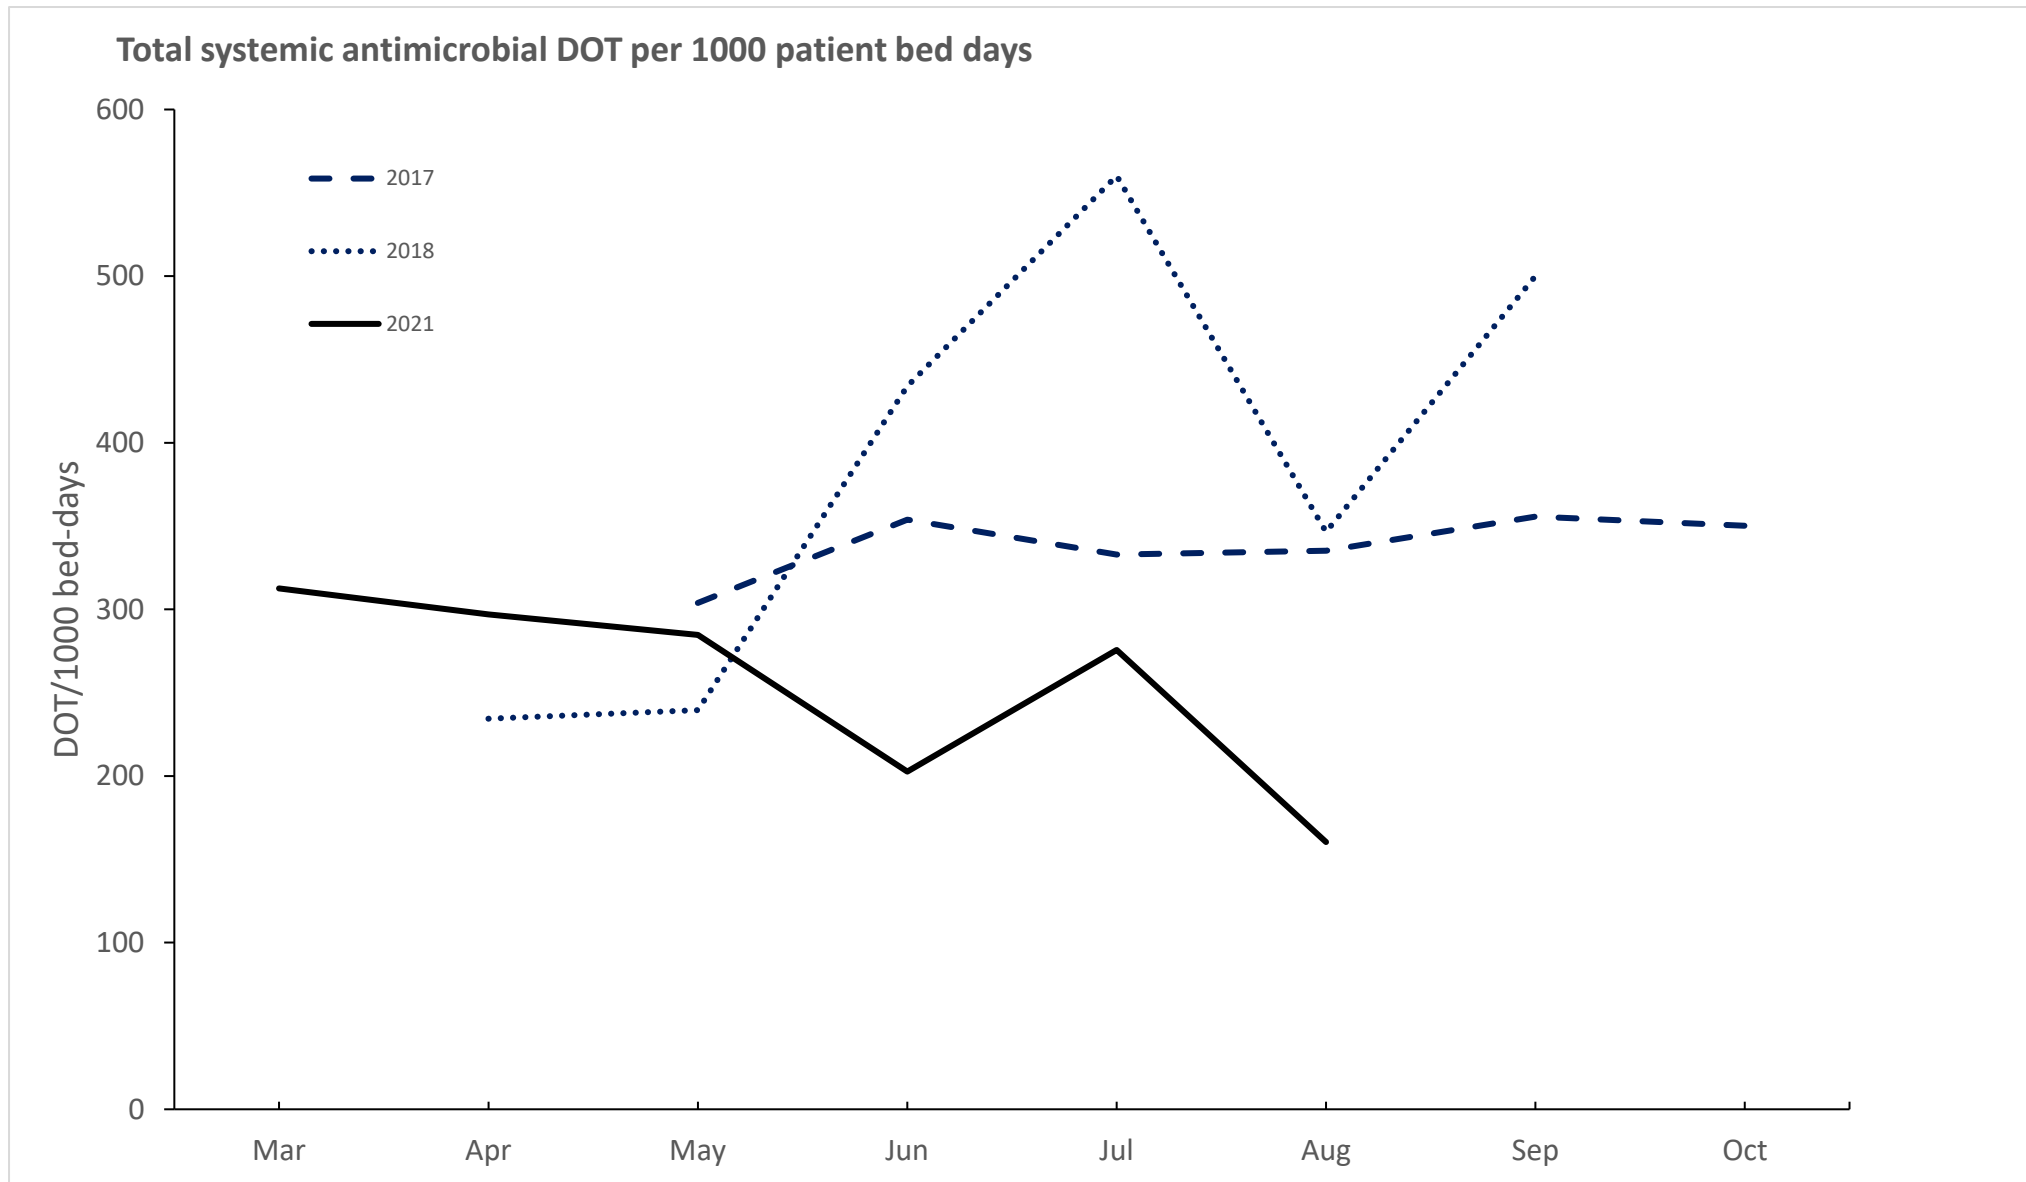

| <b>TABLE 1. PATIENT DEMOGRAPHICS, ALLERGIES AND OVERALL ANTIMICROBIAL PRESCRIBING FREQUENCY</b> |                  |                                     |                                                      |                                           |                                                                       |
|-------------------------------------------------------------------------------------------------|------------------|-------------------------------------|------------------------------------------------------|-------------------------------------------|-----------------------------------------------------------------------|
| <b>DEMOGRAPHICS</b>                                                                             |                  | <b>PRE-IMPLEMENTATION<br/>n (%)</b> | <b>IMMEDIATELY<br/>POST-IMPLEMENTATION<br/>n (%)</b> | <b>3YRS POST-IMPLEMENTATION<br/>n (%)</b> | <b>Overall p-value<br/>(Fisher's Exact<br/>or Kruskal<br/>Wallis)</b> |
| <b>Sex</b>                                                                                      | Male             | 50/68 (74)                          | 50/66 (76)                                           | 43/51 (84)                                | 0.36                                                                  |
|                                                                                                 | Female           | 18/68 (26)                          | 16/66 (24)                                           | 8/51 (16)                                 |                                                                       |
| <b>Paralysis</b>                                                                                | Quadriplegia     | 31/68 (46)                          | 30/66 (45)                                           | 29/51 (57)                                | 0.091                                                                 |
|                                                                                                 | Paraplegia       | 30/68 (44)                          | 34/66 (52)                                           | 22/51 (43)                                |                                                                       |
|                                                                                                 | Undefined        | 7/68 (10)                           | 2/66 (3)                                             | 0/51 (0)                                  |                                                                       |
| <b>Age</b>                                                                                      | Median [IQR]     | 55 [44-67]                          | 54 [39-64]                                           | 59 [38-71]                                | 0.39                                                                  |
| <b>Charlson Co-morbidity Index</b>                                                              | Median           | 2 [0-4]                             | 2 [0-4]                                              | 2 [1-4]                                   | 0.92                                                                  |
| <b>Number of admissions to Austin campus in 6mth period (per patient)</b>                       | Single admission | 42/68 (62)                          | 42/66 (64)                                           | 29/51 (57)                                | 0.77                                                                  |
|                                                                                                 | >1 admission     | 26/68 (38)                          | 24/66 (36)                                           | 22/51 (43)                                |                                                                       |
| <b>LOS (days) (first admission patient reviewed)</b>                                            | Median [IQR]     | 15 [7-49]                           | 25 [9-65]                                            | 20 [9-49]                                 | 0.31                                                                  |
| <b>Number patients prescribed &gt;1 antimicrobial over period</b>                               |                  | 40/68 (59)                          | 31/66 (47)                                           | 22/51 (43)                                | 0.20                                                                  |

|                                                             |                                         |                                                      |                                               | Unadjusted analysis: logistic regression accounting for clustering within the individual |         |                           |         |
|-------------------------------------------------------------|-----------------------------------------|------------------------------------------------------|-----------------------------------------------|------------------------------------------------------------------------------------------|---------|---------------------------|---------|
|                                                             |                                         |                                                      |                                               | Immediately Post vs pre implementation                                                   |         | 3yr vs pre implementation |         |
| <b>TABLE 2. PROPORTION OF ORDERS BY ANTIMICROBIAL CLASS</b> |                                         |                                                      |                                               | OR (95% CI)                                                                              | p value | OR (95% CI)               | p value |
|                                                             | PRE-IMPLEMENTATION ANTIMICROBIALS n (%) | IMMEDIATELY POST IMPLEMENTATION ANTIMICROBIALS n (%) | 3YRS POST-IMPLEMENTATION ANTIMICROBIALS n (%) |                                                                                          |         |                           |         |
| <b>Antimicrobial orders reviewed and included</b>           | 148                                     | 141                                                  | 108                                           |                                                                                          |         |                           |         |
| Restricted                                                  | 42/148 (28)                             | 43/141 (31)                                          | 31/108 (29)                                   | 1.11 (0.58, 2.12)                                                                        | 0.759   | 1.02 (0.53, 1.95)         | 0.962   |
| Non-restricted                                              | 106/148 (72)                            | 98/141 (69)                                          | 77/108 (71)                                   |                                                                                          |         |                           |         |
| <b>Penicillins</b>                                          | 55/148 (37)                             | 46/141 (33)                                          | 40/108 (37)                                   | 0.82 (0.52, 1.29)                                                                        | 0.391   | 0.99 (0.61, 1.62)         | 0.983   |
| Restricted Penicillin                                       | 9/55 (16)                               | 16/46 (35)                                           | 3/40 (8)                                      | 2.73 (1.10, 6.73)                                                                        | 0.03    | 0.41 (0.11, 1.52)         | 0.185   |
| Non-restricted Penicillin                                   | 46/55 (84)                              | 30/46 (65)                                           | 37/40 (93)                                    |                                                                                          |         |                           |         |
| <b>Cefalosporins</b>                                        | 31/148 (21)                             | 29/141 (21)                                          | 20/108 (19)                                   | 0.98 (0.52, 1.82)                                                                        | 0.942   | 0.86 (0.46, 1.61)         | 0.634   |
| Restricted Cefalosporins                                    | 12/31 (39)                              | 8/29 (28)                                            | 11/20 (55)                                    | 0.60 (0.16, 2.22)                                                                        | 0.448   | 1.94 (0.47, 7.90)         | 0.358   |
| Non-restricted Cefalosporins                                | 19/31 (61)                              | 21/29 (72)                                           | 9/20 (45)                                     | Ref                                                                                      |         | Ref                       |         |
| Carbapenem                                                  | 2/148 (1)                               | 6/141 (4)                                            | 1/108 (1)                                     | 3.24 (0.71, 14.81)                                                                       | 0.129   | 0.68 (0.06, 7.47)         | 0.754   |
| Glycopeptide (IV and PO)                                    | 5/148 (3)                               | 6/141 (4)                                            | 4/108 (4)                                     | 1.27 (0.35, 4.63)                                                                        | 0.716   | 1.10 (0.31, 3.89)         | 0.882   |
| Lincosamide                                                 | 1/148 (1)                               | 3/141 (2)                                            | 0                                             | 3.20 (0.27, 38.14)                                                                       | 0.358   | n/a                       |         |
| Macrolide                                                   | 3/148 (2)                               | 1/141 (1)                                            | 1/108 (1)                                     | 0.35 (0.04, 3.37)                                                                        | 0.36    | 0.45 (0.05, 4.32)         | 0.49    |
| Nitroimidazole                                              | 3/148 (2)                               | 7/141 (5)                                            | 9/108 (8)                                     | 2.52 (0.66, 9.71)                                                                        | 0.178   | 4.39 (1.27, 15.15)        | 0.019   |
| Quinolone                                                   | 5/148 (3)                               | 1/141 (1)                                            | 8/108 (7)                                     | 0.20 (0.02, 1.70)                                                                        | 0.142   | 2.29 (0.69, 7.62)         | 0.178   |
| Sulfamethoxazole +/- Trimethoprim                           | 6/148 (4)                               | 11/141 (8)                                           | 11/108 (10)                                   | 2.00 (0.66, 6.09)                                                                        | 0.221   | 2.68 (0.91, 7.93)         | 0.074   |

|                     |            |             |           |                         |       |                      |       |
|---------------------|------------|-------------|-----------|-------------------------|-------|----------------------|-------|
| Tetracycline        | 8/148 (5)  | 5/141 (4)   | 1/108 (1) | 0.64<br>(0.21,<br>1.94) | 0.434 | 0.16 (0.02,<br>1.33) | 0.09  |
| Aminoglycoside      | 3/148 (2)  | 2/141 (1)   | 6/108 (6) | 0.70<br>(0.13,<br>3.69) | 0.67  | 2.84 (0.83,<br>9.76) | 0.097 |
| Systemic antifungal | 2/148 (1)  | 1/141 (1)   | 0         | 0.52<br>(0.05,<br>5.39) | 0.585 | n/a                  |       |
| Topical antifungal  | 13/148 (9) | 16/141 (11) | 6/108 (6) | 1.33<br>(0.62,<br>2.83) | 0.46  | 0.61 (0.22,<br>1.70) |       |
| Other*              | 11/148 (7) | 7/141 (5)   | 1/108 (1) | 0.65<br>(0.23,<br>1.86) | 0.423 | 0.12 (0.01,<br>0.92) | 0.042 |

\*The category 'Other' included: Nitrofurantoin, Oseltamivir, Linezolid, Valaciclovir, Trimethoprim (monotherapy), and Chloramphenicol (topical)

|                                                  |                                         |                                                     |                                              | <b>Unadjusted analysis:<br/>logistic regression<br/>accounting for clustering<br/>within the individual</b> |         |
|--------------------------------------------------|-----------------------------------------|-----------------------------------------------------|----------------------------------------------|-------------------------------------------------------------------------------------------------------------|---------|
| <b>TABLE 3. ANTIMICROBIAL ORDERS OF INTEREST</b> |                                         |                                                     |                                              | 3yr vs pre implementation                                                                                   |         |
| <b>ANTIMICROBIAL ORDERS<br/>OF INTEREST</b>      | <b>PRE-<br/>IMPLEMENTATION<br/>n(%)</b> | <b>IMMEDIATELY POST<br/>IMPLEMENTATION<br/>n(%)</b> | <b>3YRS POST<br/>IMPLEMENTATION<br/>n(%)</b> | OR (95% CI)                                                                                                 | p value |
| Meropenem                                        | 2/148 (1)                               | 6/141 (4)                                           | 1/108 (1)                                    | 0.68 (0.06,<br>7.47)                                                                                        | 0.754   |
| Ciprofloxacin                                    | 5/148 (3)                               | 1/141 (1)                                           | 8/108 (7)                                    | 2.29 (0.69,<br>7.62)                                                                                        | 0.178   |
| Ceftriaxone                                      | 9/148 (6)                               | 3/141 (2)                                           | 9/108 (8)                                    | 1.40 (0.53,<br>3.71)                                                                                        | 0.494   |
| Piperacillin/Tazobactam                          | 7/148 (5)                               | 7/141 (5)                                           | 1/108 (1)                                    | 0.19 (0.02,<br>1.49)                                                                                        | 0.113   |
| Glycopeptides (IV)                               | 4/148 (3)                               | 3/141 (2)                                           | 2/108 (2)                                    | 0.68 (0.13,<br>3.69)                                                                                        | 0.654   |
| Trimethoprim (+/-<br>sulfamethoxazole)           | 6/148 (4)                               | 11/141 (8)                                          | 11/108 (10)                                  | 2.68 (0.91,<br>7.93)                                                                                        | 0.074   |
| Amoxicillin/clavulanate<br>(O/IV)                | 24/148 (16)                             | 24/141 (17)                                         | 23/108 (21)                                  | 1.40 (0.75,<br>2.60)                                                                                        | 0.291   |
| Gentamicin                                       | 3/148 (2)                               | 2/141 (1)                                           | 4/108 (4)                                    | 1.86 (0.41,<br>8.49)                                                                                        | 0.424   |



|                                                                  |                                                  |                                                      |                                                               |                                                      |                                                        |                                                      | <b>COURSE DURATION</b>                                                                 |         |
|------------------------------------------------------------------|--------------------------------------------------|------------------------------------------------------|---------------------------------------------------------------|------------------------------------------------------|--------------------------------------------------------|------------------------------------------------------|----------------------------------------------------------------------------------------|---------|
|                                                                  |                                                  |                                                      |                                                               |                                                      |                                                        |                                                      | Unadjusted analysis: linear regression accounting for clustering within the individual |         |
| <b>TABLE 4. PROPORTION AND DURATION OF ANTIMICROBIAL COURSES</b> |                                                  |                                                      |                                                               |                                                      |                                                        |                                                      | 3yr vs pre implementation                                                              |         |
|                                                                  | PRE-IMPLEMENTATION<br><b>MEDIAN (days) [IQR]</b> |                                                      | IMMEDIATELY POST-IMPLEMENTATION<br><b>MEDIAN (days) [IQR]</b> |                                                      | 3YRS POST-IMPLEMENTATION<br><b>MEDIAN (days) [IQR]</b> |                                                      | exp coef (95% CI)                                                                      | p value |
| Total course duration (for single indication)                    | 11 [8-19]                                        |                                                      | 10 [6-15]                                                     |                                                      | 7 [5-11]                                               |                                                      | 0.62 (0.49, 0.77)                                                                      | <0.001  |
|                                                                  | PRE-IMPLEMENTATION                               |                                                      | IMMEDIATELY POST-IMPLEMENTATION                               |                                                      | 3YRS POST-IMPLEMENTATION                               |                                                      |                                                                                        |         |
|                                                                  | Proportion of antimicrobial courses n (%)        | Duration of antimicrobial course (days) Median [IQR] | Proportion of antimicrobial courses n (%)                     | Duration of antimicrobial course (days) Median [IQR] | Proportion of antimicrobial courses n (%)              | Duration of antimicrobial course (days) Median [IQR] |                                                                                        |         |
| SSTI                                                             | 17/104 (15)                                      | 12 [7-14]                                            | 16/103 (16)                                                   | 13 [10-15]                                           | 7/82 (7)                                               | 5 [4-12]                                             | 0.57 (0.33, 0.99)                                                                      | 0.045   |
| Bacteremia                                                       | 5/104 (5)                                        | 15 [14-15]                                           | 6/103 (6)                                                     | 14 [12-14]                                           | 4/82 (5)                                               | 21 [12-30]                                           | 1.19 (0.54, 2.59)                                                                      | 0.643   |
| Pulmonary                                                        | 23/104 (22)                                      | 10 [7-12]                                            | 17/103 (19)                                                   | 6 [5-7]                                              | 11/82 (13)                                             | 5 [5-8]                                              | 0.55 (0.33, 0.91)                                                                      | 0.022   |
| Joint/Bone/OM                                                    | 8/104 (8)                                        | 42 [15-72]*                                          | 10/103 (10)                                                   | 46 [41-50]                                           | 3/82 (4)                                               | 42 [38-46]                                           | 1.01 (0.54, 1.90)                                                                      | 0.972   |
| Superficial fungal                                               | 12/104 (12)                                      | 29 [24-52]                                           | 14/103 (14)                                                   | 15 [12-24]                                           | 6/82 (7)                                               | 30 [19-41]                                           | 0.83 (0.48, 1.44)                                                                      | 0.493   |
| Gastrointestinal                                                 | 4/104 (4)                                        | 12 [9-17]                                            | 6/103 (6)                                                     | 11 [10-20]                                           | 8/82 (11)                                              | 10 [10-13]                                           | 0.93 (0.40, 2.15)                                                                      | 0.85    |
| Urinary                                                          | 30/104 (29)                                      | 9 [6-12]                                             | 27/103 (26)                                                   | 7 [5-10]                                             | 39/82 (49)                                             | 7 [5-8]                                              | 0.69 (0.53, 0.91)                                                                      | 0.009   |
| Prophylaxis                                                      | 2/104 (2)                                        | 10 [9 -10]                                           | 4/103 (4)                                                     | 3 [1-5]                                              | 2/82 (2)                                               | 3 [3-4]                                              | 0.30 (0.13, 0.68)                                                                      | 0.01    |
| Other (eg. Deep seated collections, abscess)                     | 3/104 (3)                                        | 19 [13-20]                                           | 3/103 (3)                                                     | 40 [38-54]                                           | 2/82 (2)                                               | 15 [1-23]                                            | 0.41 (0.01, 17.04)                                                                     | 0.589   |

\*Includes two courses (15 days) - patient ended up on lifelong suppression (maintenance)

| <b>TABLE 5. AMS MOMENTS AND ACCEPTANCE RATES</b>                          |                                                                                            |                                              |
|---------------------------------------------------------------------------|--------------------------------------------------------------------------------------------|----------------------------------------------|
| <b>ACTUAL AMS MOMENTS</b>                                                 | <b>IMMEDIATELY POST-IMPLEMENTATION</b>                                                     | <b>3YRS POST-IMPLEMENTATION</b>              |
| <b>Number of AMS moments</b>                                              | 139                                                                                        | 124                                          |
| <b>Average number of AMS moments per round</b>                            | 5                                                                                          | 5                                            |
| <b>Average number of AMS moments per antimicrobial order</b>              | 1                                                                                          | 1                                            |
| <b>Number of antimicrobial orders with <math>\geq 1</math> AMS moment</b> | 112/141 (79%)                                                                              | 91/108 (84%)                                 |
| <b>Acceptance rate</b>                                                    | 128/139 (92%)                                                                              | 118/124 (95%)                                |
| <b>Recommendations not implemented</b>                                    | 11/139 (8%)<br>2/11 Escalation<br>2/11 Discontinuation<br>1/11 Switch<br>6/11 Optimisation | 6/118 (5%)<br>1/6 Switch<br>5/6 Optimisation |
| <b>Frequency of accepted AMS moments in relation to indication</b>        |                                                                                            |                                              |
| <b>SSTI</b>                                                               | 32/128 (25%)                                                                               | 10/118 (8%)                                  |
| <b>Bacteremia</b>                                                         | 8/128 (6%)                                                                                 | 4/118 (3%)                                   |
| <b>Respiratory</b>                                                        | 22/128 (17%)                                                                               | 14/118 (12%)                                 |
| <b>Joint/Bone/OM</b>                                                      | 18/128 (14%)                                                                               | 14/118 (12%)                                 |
| <b>Superficial fungal</b>                                                 | 11/128 (9%)                                                                                | 6/118 (5%)                                   |
| <b>Gastrointestinal</b>                                                   | 6/128 (5%)                                                                                 | 10/118 (11%)                                 |
| <b>Urinary</b>                                                            | 27/128 (21%)                                                                               | 47/118 (40%)                                 |
| <b>Prophylaxis</b>                                                        | 4/128 (3%)                                                                                 | 3/118 (3%)                                   |
| <b>Other</b>                                                              | -                                                                                          | 10/118 (8%)                                  |
| <b>Frequency of each accepted AMS moment</b>                              |                                                                                            |                                              |
| <b>Escalation</b>                                                         | 8/128 (6%)                                                                                 | 6/118 (5%)                                   |
| <b>De-escalation</b>                                                      | 7/128 (5%)                                                                                 | 6/118 (5%)                                   |
| <b>Discontinuation</b>                                                    | 48/128 (38%)                                                                               | 38/118 (32%)                                 |
| <b>Switch</b>                                                             | 15/128 (12%)                                                                               | 13/118 (11%)                                 |
| <b>Optimise</b>                                                           | 50/128 (39%)                                                                               | 55/118 (47%)                                 |

## **ADDITIONAL INFORMATION**

### **DEFINITIONS:**

Antimicrobial **order** = Single antimicrobial via one route for single indication

Antimicrobial **course** = Intravenous (IV) + oral (PO) for single indication (Can include **more than one** IV and/or PO order)

For example: Two days of gentamicin, followed by 3 days of trimethoprim/sulfamethoxazole to treat acute cystitis. This is made up of two antimicrobial orders but is one antimicrobial course – duration of 5 days.

If, for the above example, the trimethoprim/sulfamethoxazole order was reviewed at the Tuesday meeting, this order was included as a 'reviewed order'. It counted towards the number of oral antimicrobials orders prescribed and reviewed. The preceding order of gentamicin contributed to the total course duration but was not included in the IV orders reviewed – as it was prescribed without involvement from the AMS team.
